# Supplementary material for: Nucleophilic identity substitution reactions. The reaction between hydrogen fluoride and protonated alkyl fluorides
Source: Royal Society of Chemistry journal article supplement (doi:10.1039/b513315g), 2005-11-28
Supplement: b513315g.pdf [file b513315g.pdf]

Supplementary material for "Nucleophilic identity substitution reactions. The reaction between hydrogen fluoride and protonated alkyl fluorides" by Jon K. Laerdahl, Pervin U. Civcir, Lihn Bache-Andreassen, and Einar Uggerud.

SUPPLEMENTARY MATERIAL, HF + RFH+:

Cartesian coordinates:

HF:

|   |          |           |           |
|---|----------|-----------|-----------|
| F | 0.000000 | -0.000000 | -0.092650 |
| H | 0.000000 | 0.000000  | 0.833850  |

H<sub>2</sub>F<sup>+</sup>:

|   |           |           |           |
|---|-----------|-----------|-----------|
| H | -0.098183 | 0.000000  | -0.914338 |
| F | -0.079886 | 0.000000  | 0.054727  |
| H | 0.817155  | -0.000000 | 0.421795  |

(HF)<sub>2</sub>:

|   |           |           |           |
|---|-----------|-----------|-----------|
| F | -0.230158 | -0.000000 | -1.436624 |
| H | -0.230158 | -0.000000 | -0.504603 |
| F | 0.141479  | -0.000000 | 1.315561  |
| H | 1.028276  | 0.000000  | 1.594161  |

HF--H--FH<sup>+</sup>:

|   |           |           |           |
|---|-----------|-----------|-----------|
| H | -1.192753 | -0.475779 | -1.279226 |
| F | -1.062452 | -0.050228 | -0.439046 |
| H | 0.000000  | 0.000000  | 0.000000  |
| F | 1.062452  | 0.050228  | 0.439046  |
| H | 1.192753  | 0.475780  | 1.279226  |

A1, CH<sub>3</sub>FH<sup>+</sup>:

|   |           |           |           |
|---|-----------|-----------|-----------|
| C | -0.045740 | 0.026408  | -0.850364 |
| F | -0.028558 | 0.016488  | 0.780110  |
| H | 0.860592  | 0.570578  | -1.074765 |
| H | -0.063840 | -1.030584 | -1.074764 |
| H | -0.974862 | 0.562837  | -0.977404 |
| H | 0.709573  | -0.409672 | 1.208126  |

A2, HF--CH<sub>3</sub>FH<sup>+</sup>:

|   |           |           |           |
|---|-----------|-----------|-----------|
| C | -0.298539 | 0.004766  | -0.000006 |
| F | 2.136908  | 0.213106  | -0.002518 |
| H | 3.024964  | 0.497905  | -0.005596 |
| H | -0.295182 | 1.083151  | -0.011170 |
| H | -0.055224 | -0.501441 | -0.920872 |
| H | -0.054953 | -0.482269 | 0.931072  |
| F | -1.970410 | -0.166305 | 0.002009  |
| H | -2.326850 | -1.047146 | 0.011180  |

A3, CH<sub>3</sub>FH--FH<sup>+</sup>:

|   |           |           |           |
|---|-----------|-----------|-----------|
| C | -0.826535 | 1.397876  | -0.186774 |
| F | -0.699378 | -0.143513 | -0.310058 |
| F | 1.342440  | -1.050974 | 0.443119  |
| H | -0.728419 | 1.577853  | 0.874427  |
| H | -1.818971 | 1.544409  | -0.586619 |
| H | -0.022916 | 1.770466  | -0.806081 |
| H | 0.179540  | -0.562253 | 0.010931  |
| H | 1.562418  | -1.967343 | 0.430439  |

A4, CH<sub>3</sub><sup>+</sup>:

|   |           |           |           |
|---|-----------|-----------|-----------|
| C | -0.000001 | 0.000000  | 0.000006  |
| H | 0.939443  | 0.543006  | -0.026045 |
| H | -0.000537 | -1.085085 | -0.026045 |
| H | -0.938902 | 0.542076  | 0.052053  |

## TS (A2,A2'), HF--CH3--FH+:

|   |           |           |           |
|---|-----------|-----------|-----------|
| C | -0.000993 | 0.008627  | -0.017086 |
| F | 2.016567  | -0.001013 | -0.095892 |
| F | -2.014554 | -0.016475 | 0.130522  |
| H | -0.013640 | 0.593613  | 0.887192  |
| H | -0.056759 | 0.493276  | -0.976858 |
| H | 0.067816  | -1.064439 | 0.045205  |
| H | 2.641087  | 0.693969  | 0.000232  |
| H | -2.659256 | -0.536072 | -0.312924 |

Imaginary Frequency: 236.5i cm-1

## TS (A3,A3'), HF--CH3--FH+:

|   |           |           |           |
|---|-----------|-----------|-----------|
| C | -0.165613 | 1.441064  | -0.004668 |
| F | -1.353559 | -0.696674 | -0.029865 |
| F | 1.411872  | -0.477691 | 0.032644  |
| H | -0.620317 | 1.321054  | 0.968974  |
| H | -0.775281 | 1.347750  | -0.892689 |
| H | 0.875139  | 1.716993  | -0.086602 |
| H | -1.285242 | -1.627465 | -0.044293 |
| H | 2.274557  | -0.835429 | 0.057606  |

Imaginary Frequency: 286.0i cm-1

## TS (A2,A3), HF--CH3FH+:

|   |           |           |           |
|---|-----------|-----------|-----------|
| C | 0.071147  | -0.340525 | 0.024730  |
| F | -0.143236 | -0.199208 | 1.647677  |
| F | 2.748324  | 0.398863  | -0.663945 |
| H | 0.761154  | -1.170142 | 0.049895  |
| H | 0.500685  | 0.618159  | -0.223577 |
| H | -0.939298 | -0.549029 | -0.295957 |
| H | 3.610745  | 0.581842  | -0.964416 |
| H | -0.589004 | 0.582725  | 1.957796  |

Imaginary Frequency: 47.9i cm-1

## B1, CH3CH2FH+:

|   |           |           |           |
|---|-----------|-----------|-----------|
| C | 0.081880  | -0.108898 | -0.915426 |
| C | -1.098265 | 0.602803  | -0.805842 |
| F | 0.836344  | -0.406254 | 1.486938  |
| H | 1.033819  | 0.405868  | -0.928950 |
| H | 0.066772  | -1.185892 | -1.026477 |
| H | 1.218179  | -0.671023 | 2.295152  |
| H | -1.077194 | 1.676908  | -0.670336 |
| H | -0.621795 | 0.381960  | -1.956540 |
| H | -2.048567 | 0.085033  | -0.767685 |

## B2, HF--CH3CH2--FH+:

|   |           |           |           |
|---|-----------|-----------|-----------|
| C | 0.228072  | -0.126442 | 0.291889  |
| C | -0.129625 | 1.152360  | -0.078809 |
| F | 2.759302  | -0.361326 | -0.110581 |
| F | -2.739261 | -0.447569 | -0.088405 |
| H | -3.636027 | -0.704813 | -0.068392 |
| H | 0.576143  | -0.329179 | 1.296047  |
| H | 0.133859  | -0.948671 | -0.404910 |
| H | 3.648976  | -0.599972 | -0.250052 |
| H | -0.020593 | 1.973937  | 0.617508  |
| H | -0.463272 | 1.358529  | -1.087635 |
| H | -1.010137 | 0.374714  | 0.409827  |

## B3, CH3CH2FH--FH+:

|   |           |           |           |
|---|-----------|-----------|-----------|
| C | -0.941703 | 0.620516  | -0.000020 |
| C | -2.235244 | -0.089105 | -0.000070 |
| F | 0.172876  | -0.594300 | -0.000003 |
| F | 2.463937  | 0.143236  | 0.000078  |
| H | -0.648442 | 1.125426  | 0.912214  |
| H | -0.648385 | 1.125452  | -0.912221 |

|   |           |           |           |
|---|-----------|-----------|-----------|
| H | 1.133534  | -0.324058 | 0.000031  |
| H | 3.232792  | -0.397085 | 0.000094  |
| H | -2.987885 | 0.707703  | -0.000082 |
| H | -2.375599 | -0.683153 | -0.898276 |
| H | -2.375655 | -0.683179 | 0.898110  |

B4, CH3CH2+:

|   |           |           |           |
|---|-----------|-----------|-----------|
| C | 0.162298  | -0.675241 | 0.000037  |
| C | -0.281138 | 0.635022  | -0.000034 |
| H | -0.466099 | 1.153031  | 0.933716  |
| H | -0.466102 | 1.152929  | -0.933841 |
| H | 0.329902  | -1.199022 | 0.933844  |
| H | 0.329899  | -1.199124 | -0.933714 |
| H | 0.985437  | 0.333501  | -0.000020 |

B5, CH2CH2:

|   |           |           |           |
|---|-----------|-----------|-----------|
| C | 0.165712  | -0.648734 | 0.000035  |
| C | -0.165711 | 0.648733  | -0.000035 |
| H | -0.305413 | 1.195693  | 0.922258  |
| H | -0.305416 | 1.195593  | -0.922388 |
| H | 0.305415  | -1.195592 | 0.922388  |
| H | 0.305412  | -1.195693 | -0.922259 |

TS (B2, B2'), HF-- (CH3)CH2--FH+:

|   |           |           |           |
|---|-----------|-----------|-----------|
| C | -0.002297 | -0.184447 | -0.018556 |
| C | -0.001738 | 1.250423  | 0.039497  |
| F | -2.301890 | -0.494981 | -0.010031 |
| F | 2.297058  | -0.496733 | -0.011068 |
| H | -0.002335 | -0.807065 | 0.864917  |
| H | -0.002706 | -0.689346 | -0.975092 |
| H | -3.025838 | -1.082121 | 0.058289  |
| H | 3.020584  | -1.084432 | 0.056919  |
| H | -0.861390 | 1.595021  | -0.552210 |
| H | -0.001352 | 1.667864  | 1.037678  |
| H | 0.857905  | 1.594369  | -0.552602 |

Imaginary Frequency: 173.9i cm-1

TS (B2, B3), HF-- (CH3)CH2--FH+:

|   |           |           |           |
|---|-----------|-----------|-----------|
| C | -0.400107 | 0.141341  | 0.357385  |
| F | 0.255521  | -0.703455 | 2.462682  |
| F | 2.565901  | 0.297019  | 1.087053  |
| C | -0.401309 | 1.527829  | 0.402546  |
| H | -1.298131 | -0.417570 | 0.588929  |
| H | 0.456156  | -0.386696 | -0.040678 |
| H | 1.133276  | -0.746147 | 2.776693  |
| H | 3.495073  | 0.343747  | 1.026290  |
| H | -0.783677 | 1.097301  | -0.664538 |
| H | -1.241653 | 2.054038  | 0.836942  |
| H | 0.515092  | 2.068378  | 0.205745  |

Imaginary Frequency: 88.1i cm-1

C1, (CH3)2CHF+:

|   |           |           |           |
|---|-----------|-----------|-----------|
| C | 0.093623  | 0.064322  | -0.733352 |
| C | -1.101159 | 0.867591  | -0.752288 |
| F | 0.762621  | 0.387653  | 1.758706  |
| H | 1.048931  | 0.582688  | -0.751356 |
| C | 0.118854  | -1.375337 | -0.722711 |
| H | 1.105774  | 0.493974  | 2.619451  |
| H | -1.137012 | 1.179087  | 0.313196  |
| H | -0.988145 | 1.793905  | -1.313166 |
| H | -2.010931 | 0.320126  | -0.977638 |
| H | 0.987998  | -1.788624 | -0.217225 |
| H | -0.821978 | -1.841095 | -0.445455 |
| H | 0.283867  | -1.568394 | -1.806058 |

## C2, HF--(CH3)2CH--FH+:

|   |           |           |           |
|---|-----------|-----------|-----------|
| C | -0.117334 | -1.270579 | 0.724182  |
| C | 0.006315  | -0.000063 | 0.054251  |
| C | 0.129212  | 1.269631  | 0.725877  |
| F | 2.517847  | -0.305799 | -0.648527 |
| F | -2.504426 | 0.306536  | -0.650973 |
| H | 0.006923  | 0.000602  | -1.030824 |
| H | -3.358945 | 0.466469  | -0.987506 |
| H | 3.372744  | -0.465321 | -0.984294 |
| H | 0.320900  | -2.092951 | 0.164775  |
| H | 0.164701  | -1.250440 | 1.772551  |
| H | -1.215850 | -1.413098 | 0.668098  |
| H | 1.227791  | 1.412219  | 0.671199  |
| H | -0.308395 | 2.092688  | 0.166988  |
| H | -0.153998 | 1.248207  | 1.773904  |

## C3, (CH3)2CH--FH--FH+:

|   |           |           |           |
|---|-----------|-----------|-----------|
| C | -0.479831 | -0.775873 | -1.124776 |
| C | -0.223196 | 0.098066  | 0.010711  |
| H | -0.068112 | -0.371491 | 0.976924  |
| C | -0.510224 | 1.523986  | 0.009471  |
| F | 1.864913  | 0.319862  | -0.125622 |
| H | -1.549279 | -1.021721 | -1.000032 |
| H | -0.359268 | -0.281182 | -2.083699 |
| H | 0.057861  | -1.717928 | -1.063527 |
| H | 0.071322  | 2.059630  | 0.755546  |
| H | -0.452813 | 1.977953  | -0.974540 |
| H | -1.558430 | 1.560869  | 0.354490  |
| H | 2.537855  | -0.342939 | -0.253676 |
| F | 3.531100  | -1.597673 | -0.500135 |
| H | 4.465282  | -1.622613 | -0.499133 |

## C4, (CH3)2CH+:

|   |           |           |           |
|---|-----------|-----------|-----------|
| C | 0.093616  | 0.401422  | -0.212524 |
| C | 0.080804  | 0.402569  | 1.225287  |
| H | 1.178604  | 0.379092  | 1.416703  |
| H | -0.357043 | -0.480057 | 1.680793  |
| H | -0.250943 | 1.345141  | 1.658271  |
| C | -0.160233 | -0.743159 | -1.044969 |
| H | 0.313476  | 1.344171  | -0.711643 |
| H | -1.212183 | -0.523079 | -1.340472 |
| H | 0.393762  | -0.732739 | -1.982495 |
| H | -0.150791 | -1.697516 | -0.527922 |

## C5, CH3CHCH2:

|   |           |           |           |
|---|-----------|-----------|-----------|
| C | -0.460424 | -0.009079 | -0.137120 |
| C | -0.492892 | -0.008447 | 1.203582  |
| H | 0.418689  | 0.009823  | 1.787923  |
| H | -1.428368 | -0.026121 | 1.745325  |
| H | -1.398780 | -0.027834 | -0.683206 |
| C | 0.795110  | 0.014556  | -0.955272 |
| H | 1.676559  | 0.032292  | -0.314661 |
| H | 0.857642  | -0.863452 | -1.600433 |
| H | 0.823498  | 0.893115  | -1.602086 |

## D1a, (CH3)3C--FH+:

|   |           |           |           |
|---|-----------|-----------|-----------|
| C | -0.724956 | -0.712469 | -1.209234 |
| C | -0.610119 | 0.023462  | 0.047974  |
| C | -0.662560 | 1.481191  | 0.037670  |
| C | -0.524972 | -0.687385 | 1.321865  |
| F | 2.088043  | -0.095172 | -0.164035 |
| H | -1.814077 | -0.836953 | -1.338236 |
| H | -0.379363 | -0.131407 | -2.061534 |

|   |           |           |           |
|---|-----------|-----------|-----------|
| H | -0.278783 | -1.701083 | -1.171162 |
| H | -0.088775 | -1.677249 | 1.233684  |
| H | -0.050737 | -0.090187 | 2.097713  |
| H | -1.580130 | -0.807608 | 1.622714  |
| H | 0.403775  | 1.752552  | -0.049271 |
| H | -1.168018 | 1.887101  | -0.835413 |
| H | -1.025282 | 1.905005  | 0.971126  |
| H | 3.012636  | -0.189039 | -0.236157 |

D1b, (CH3)3C--FH+:

|   |           |           |           |
|---|-----------|-----------|-----------|
| C | 0.688635  | 0.000000  | 0.037976  |
| C | 0.504365  | -0.000001 | 1.486015  |
| C | 0.755012  | -1.268478 | -0.681157 |
| C | 0.755015  | 1.268480  | -0.681154 |
| F | -2.170924 | 0.000002  | -0.149558 |
| H | 0.028874  | -0.905149 | 1.854960  |
| H | 0.028876  | 0.905147  | 1.854962  |
| H | 1.541742  | -0.000002 | 1.865824  |
| H | -0.305366 | -1.472606 | -0.909405 |
| H | 1.097662  | -2.088891 | -0.053681 |
| H | 1.292365  | -1.207996 | -1.622824 |
| H | -0.305363 | 1.472610  | -0.909403 |
| H | 1.097665  | 2.088891  | -0.053677 |
| H | 1.292367  | 1.207998  | -1.622822 |
| H | -3.102845 | 0.000004  | -0.167655 |

D2, HF--(CH3)3C--FH+:

|   |           |           |           |
|---|-----------|-----------|-----------|
| C | 0.000000  | 0.000000  | 0.000000  |
| C | 0.000000  | 0.000000  | 1.460065  |
| C | 1.268424  | 0.000000  | -0.721677 |
| H | 2.090455  | -0.401312 | -0.134681 |
| H | 1.196344  | -0.454881 | -1.706176 |
| H | 1.460073  | 1.076221  | -0.867403 |
| H | 0.897452  | 0.454297  | 1.873922  |
| H | 0.045433  | -1.074247 | 1.705189  |
| H | -0.908740 | 0.408349  | 1.890404  |
| F | 0.202114  | -2.886758 | -0.016592 |
| H | 0.305754  | -3.812278 | -0.044008 |
| F | -0.204627 | 2.724483  | 0.023554  |
| H | -0.328406 | 3.647145  | 0.062527  |
| C | -1.254026 | -0.075131 | -0.744019 |
| H | -1.409878 | -1.161438 | -0.852670 |
| H | -1.163884 | 0.330795  | -1.749097 |
| H | -2.100261 | 0.336964  | -0.203822 |

D3a, (CH3)3C--FH--FH+:

|   |           |           |           |
|---|-----------|-----------|-----------|
| C | 0.000000  | 0.000000  | 0.000000  |
| C | 0.000000  | 0.000000  | 1.459639  |
| C | 1.271183  | 0.000000  | -0.721921 |
| C | -1.266646 | -0.107306 | -0.721921 |
| F | -0.109128 | 2.580946  | -0.129790 |
| H | -0.145886 | 3.450261  | -0.494325 |
| F | -0.208478 | 4.930437  | -1.316990 |
| H | -0.245945 | 5.816739  | -1.029765 |
| H | -0.045461 | 1.075133  | 1.699863  |
| H | 0.922640  | -0.386439 | 1.886221  |
| H | -0.886725 | -0.462946 | 1.886221  |
| H | 2.066888  | 0.474775  | -0.152316 |
| H | 1.530362  | -1.070002 | -0.792888 |
| H | 1.191595  | 0.393858  | -1.729895 |
| H | -1.434573 | -1.195368 | -0.792892 |
| H | -1.220590 | 0.291867  | -1.729894 |
| H | -2.099590 | 0.298602  | -0.152315 |

## D3b, (CH3)3C--FH--FH+:

|   |           |           |           |
|---|-----------|-----------|-----------|
| C | 0.000000  | 0.000000  | 0.000000  |
| C | 0.000000  | 0.000000  | 1.460222  |
| C | 1.268413  | 0.000000  | -0.722027 |
| C | -1.267784 | 0.039910  | -0.722028 |
| H | -0.897657 | 0.442446  | 1.883971  |
| H | 0.911137  | 0.413976  | 1.883971  |
| H | -0.016938 | -1.075990 | 1.707811  |
| H | 2.081452  | -0.430160 | -0.140736 |
| H | 1.487315  | 1.076959  | -0.819745 |
| H | 1.200079  | -0.419597 | -1.721199 |
| H | -2.093964 | -0.364432 | -0.140735 |
| H | -1.212690 | -0.381643 | -1.721195 |
| H | -1.452664 | 1.123226  | -0.819764 |
| F | 0.043599  | 2.761145  | 0.092127  |
| H | 0.057385  | 3.660452  | 0.375062  |
| F | 0.080802  | 5.217887  | 1.058105  |
| H | 0.095209  | 6.078510  | 0.699914  |

## D4, (CH3)3C+:

|   |           |           |           |
|---|-----------|-----------|-----------|
| C | -0.015852 | -0.000257 | -0.000901 |
| C | -0.014165 | -0.002656 | 1.460896  |
| H | 1.052205  | 0.005576  | 1.739688  |
| H | -0.491283 | -0.870211 | 1.904155  |
| H | -0.412466 | 0.934047  | 1.855829  |
| C | -0.304988 | -1.224451 | -0.742318 |
| C | 0.310300  | 1.226522  | -0.720278 |
| H | -0.491290 | -1.061432 | -1.799751 |
| H | 0.623181  | -1.815392 | -0.647380 |
| H | -1.082219 | -1.820705 | -0.266077 |
| H | 0.819047  | 1.034215  | -1.664120 |
| H | -0.683489 | 1.625679  | -0.993120 |
| H | 0.814544  | 1.973279  | -0.113618 |

## D5, (CH3)2CCH2:

|   |           |           |           |
|---|-----------|-----------|-----------|
| C | -0.000055 | 0.000764  | 0.118898  |
| C | -0.000672 | 0.009402  | 1.462658  |
| H | 0.922544  | 0.047144  | 2.026188  |
| H | -0.924404 | -0.021098 | 2.025778  |
| C | -1.272695 | -0.051408 | -0.680450 |
| C | 1.273320  | 0.042664  | -0.679886 |
| H | 2.149530  | 0.079202  | -0.033664 |
| H | 1.353217  | -0.837692 | -1.321799 |
| H | 1.288343  | 0.918179  | -1.333116 |
| H | -2.149498 | -0.079641 | -0.034616 |
| H | -1.351998 | 0.820622  | -1.333701 |
| H | -1.287124 | -0.935249 | -1.322384 |

## TS (D1a, D1b), (CH3)3C--FH+:

|   |           |           |           |
|---|-----------|-----------|-----------|
| C | 0.010431  | -0.037564 | 0.000620  |
| C | 0.004117  | -0.025249 | 1.462475  |
| C | 1.259472  | -0.014094 | 2.205108  |
| C | -1.265404 | -0.039069 | 2.184344  |
| F | 0.085090  | 2.760921  | 1.468613  |
| H | -0.599918 | -0.872830 | -0.355626 |
| H | -0.527077 | 0.864497  | -0.319707 |
| H | 1.003108  | -0.054822 | -0.436030 |
| H | 1.600820  | -1.062705 | 2.145230  |
| H | 1.147676  | 0.250259  | 3.252152  |
| H | 2.022669  | 0.577098  | 1.701934  |
| H | -1.202202 | -0.645929 | 3.088712  |
| H | -2.120922 | -0.302106 | 1.570597  |
| H | -1.378321 | 0.999244  | 2.533913  |
| H | 0.160129  | 3.689922  | 1.474125  |

Imaginary Frequency: 92.7i cm-1

TS (D2,D2'), HF--(CH3)3C--FH+:

|   |           |           |           |
|---|-----------|-----------|-----------|
| C | 0.061634  | -0.146485 | 1.444454  |
| C | -0.000434 | 0.002098  | -0.007228 |
| C | -0.002199 | 1.339329  | -0.599588 |
| C | -0.059002 | -1.182138 | -0.855036 |
| F | -2.810220 | 0.002866  | 0.027456  |
| F | 2.809484  | -0.015788 | -0.019011 |
| H | -0.325063 | -2.089175 | -0.320775 |
| H | -0.672158 | -1.020849 | -1.739268 |
| H | 0.981900  | -1.278290 | -1.207794 |
| H | 0.643701  | -1.021937 | 1.729761  |
| H | -0.980411 | -0.365546 | 1.725198  |
| H | 0.386837  | 0.749867  | 1.962660  |
| H | -3.740743 | -0.018811 | -0.013294 |
| H | 3.740963  | -0.004803 | -0.003995 |
| H | -0.855059 | 1.879122  | -0.171538 |
| H | -0.060655 | 1.339227  | -1.682556 |
| H | 0.887322  | 1.870668  | -0.250022 |

Imaginary Frequency: 110.4i cm-1
